# Supplementary material
Source: MDPI journal article supplement (https://www.mdpi.com/1911-8074/14/1/22)

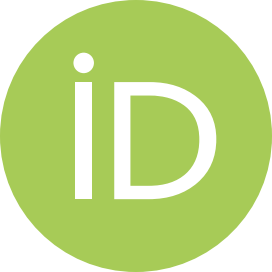

Supplement: s1 [file s1]

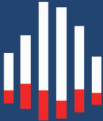

# Journal of *Risk and Financial Management*

Supplement: s1 [file s1]

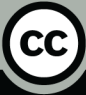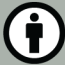

BY

Supplement: s1 [file s1]
